# Supplementary material for: Identification of Bottle Gourd (Lagenaria siceraria) OVATE Family Genes and Functional Characterization of LsOVATE1
Source: MDPI journal article supplement (doi:10.3390/biom13010085), 2022-12-30
Supplement: s1 [file s1]

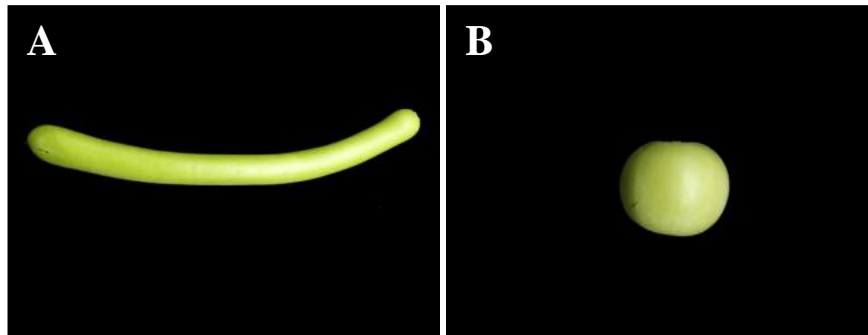

**Figure S1.** Fruit shape pictures of bottle gourd HZ and YD-4. A is HZ, a local cultivar with slender straight fruit; B is YD-4, a landrace with near-round fruit.
