# Supplementary material for: Identification of Bottle Gourd (Lagenaria siceraria) OVATE Family Genes and Functional Characterization of LsOVATE1
Source: MDPI journal article supplement (doi:10.3390/biom13010085), 2022-12-30
Supplement: s1 [file s1]

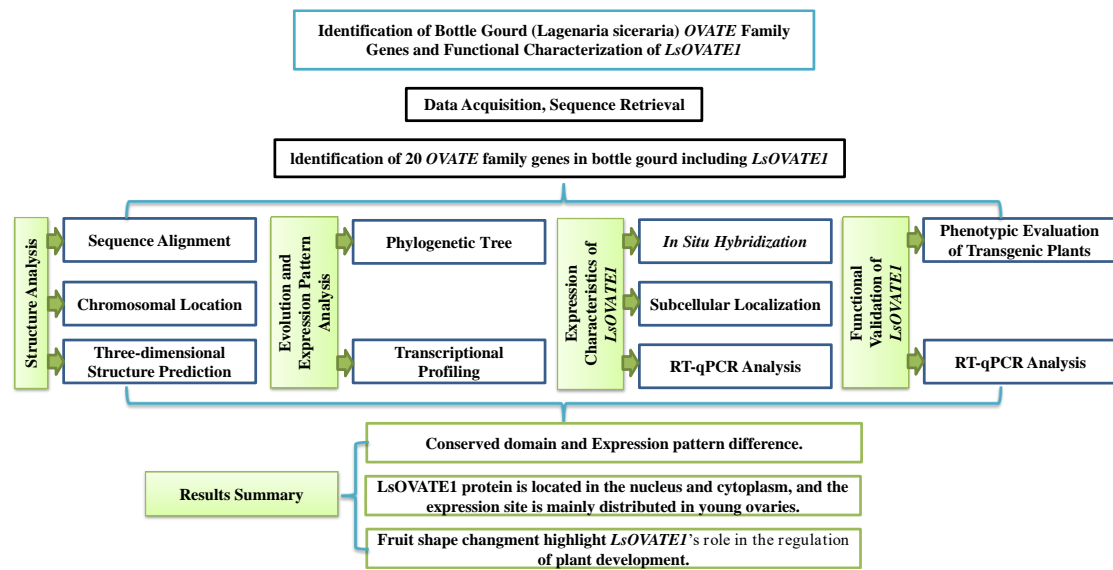

**Figure S3.** Framework figure. Systematic analysis diagram of *OVATE* gene family in bottle gourd including *LsOVATE1*'s structure, evolution and function.
