# Supplementary material for: Identification of Bottle Gourd (Lagenaria siceraria) OVATE Family Genes and Functional Characterization of LsOVATE1
Source: Biomolecules. 2022 Dec 30;13(1):85. doi: 10.3390/biom13010085 (PMC9855390; doi:10.3390/biom13010085)
Supplement: Supplementary file 1 [file biomolecules-13-00085-s001.zip › Table S1.xlsx]

## Sheet: Table S1
Table S1. List of primers.
Usage	Primer name	Pimer sequence
Plasmid construction	209-InSpeI	CTGATTAACAGACTAGTATGGAAAAAAGATTCAAACT
	209-InBamHI	GCCCTATATATGGATCCTCAGAGAAAAAAAAGAGCTT
	209-CDS-F	CACGCTTATTCCAATCTTCATTC
	209-CDS-R	GTTCACCTTGATGCCGTTCTT
RT-qPCR analysis	209-RT-F	ACGTCTGATTCCTCCGTCTC
	209-RT-R	CTCCACTCTCCGACAACCAT
	TUBα-RT-F	AGCGTACCATTCAGTTTGTTGAT
	TUBα-RT-R	AGACCTCAGCAACACTGGTAGAG
In situ hybridization	209-Sp6	GATTTAGGTGACACTATAGaatGCTTCATTACACACAAACCCATTTCC
	209-T7	tgTAATACGACTCACTATAGGGAACCCCATCTTTCACTTTCCTC
Transgenic plant detection	209-gfp-F	GACGCACAATCCCACTATCCT
	209-gfp-R	ACGTTAAACTCCGGGAAGAAA
