# Supplementary material for: Identification of Bottle Gourd (Lagenaria siceraria) OVATE Family Genes and Functional Characterization of LsOVATE1
Source: Biomolecules. 2022 Dec 30;13(1):85. doi: 10.3390/biom13010085 (PMC9855390; doi:10.3390/biom13010085)
Supplement: Supplementary file 1 [file biomolecules-13-00085-s001.zip › Table S2.xlsx]

## Sheet: Table S2
Table S2. Composition and chromosomal location of the plants.
Bottle gourd gene model	Suggested gene name	Chromosome	Position_start	Position_end	Melon homolog	E-value	Annotation_NR
HG_GLEAN_10012688	LsOFP1	Chr01	23417053	23417667	MELO3C006531	1e-79	PREDICTED: transcription repressor OFP12-like [Cucumis melo]
HG_GLEAN_10015606	LsOFP2	Chr02	28062254	28063057	MELO3C012340	1e-94	PREDICTED: transcription repressor OFP13-like [Cucumis melo]
HG_GLEAN_10015982	LsOFP3	Chr03	1914641	1924905	MELO3C007193	0	DNA polymerase III gamma-tau subunit [Cucumis melo subsp. melo]
HG_GLEAN_10016222	LsOFP4	Chr03	3622948	3623433	MELO3C007422	4e-73	probable transcription repressor OFP9 [Momordica charantia]
HG_GLEAN_10016945	LsOFP5	Chr03	9539752	9540195	MELO3C024574	1e-56	transcription repressor OFP6-like [Cucurbita moschata]
HG_GLEAN_10016946	LsOFP6	Chr03	9555872	9556693	MELO3C024573	8e-72	PREDICTED: transcription repressor OFP15-like [Cucumis sativus] >gi|700193086|gb|KGN48290.1| hypothetical protein Csa_6G454380 [Cucumis sativus]
HG_GLEAN_10017349	LsOFP7	Chr03	13489371	13490354	MELO3C025206	2e-100	PREDICTED: transcription repressor OFP1 [Cucumis melo]
HG_GLEAN_10020073	LsOFP8	Chr04	28549054	28549566	MELO3C025581	3e-22	PREDICTED: transcription repressor OFP6-like [Cucumis melo]
HG_GLEAN_10020074	LsOFP9	Chr04	28561476	28562183	MELO3C009514	7e-64	PREDICTED: transcription repressor OFP15-like [Cucumis sativus] >gi|700204047|gb|KGN59180.1| hypothetical protein Csa_3G778360 [Cucumis sativus]
HG_GLEAN_10020458	LsOFP10	Chr04	32000706	32001644	MELO3C009113	4e-83	transcription repressor OFP1-like [Cucurbita maxima]
HG_GLEAN_10022831	LsOFP11	Chr05	28760144	28760947	MELO3C015818	2e-82	PREDICTED: transcription repressor OFP12-like [Cucumis melo]
HG_GLEAN_10023338	LsOFP12	Chr05	33196658	33197443	MELO3C024232	5e-101	PREDICTED: transcription repressor OFP14 [Cucumis melo]
HG_GLEAN_10023346	LsOFP13	Chr05	33258189	33258818	MELO3C024242	4e-102	PREDICTED: uncharacterized protein LOC107991904 [Cucumis melo]
HG_GLEAN_10010244	LsOFP14	Chr06	20205559	20206137			PREDICTED: transcription repressor OFP12-like [Cucumis melo]
HG_GLEAN_10006715	LsOFP15	Chr07	21324837	21325556	MELO3C004557	3e-45	PREDICTED: transcription repressor OFP8-like [Cucumis melo]
HG_GLEAN_10004119	LsOFP16	Chr08	13885568	13886230	MELO3C019910	9e-90	PREDICTED: transcription repressor OFP13-like [Cucumis sativus] >gi|700190848|gb|KGN46052.1| hypothetical protein Csa_6G046300 [Cucumis sativus]
HG_GLEAN_10004872	LsOFP17	Chr08	21090898	21091833	MELO3C010932	2e-98	transcription repressor OFP7-like [Cucurbita moschata]
HG_GLEAN_10001585	LsOFP18	Chr09	18363582	18364110	MELO3C026874	4e-49	PREDICTED: transcription repressor OFP17 [Cucumis melo]
HG_GLEAN_10007946	LsOFP19	Chr10	17697582	17698373	MELO3C025343	1e-73	PREDICTED: transcription repressor OFP8-like [Cucumis melo]
HG_GLEAN_10001965	LsOFP20	Chr11	2189256	2190179	MELO3C017554	7e-41	transcription repressor OFP7 [Momordica charantia]
Tomato gene model	Suggested gene name	Chromosome
Solyc02g085510	OVATE	Chr02
Solyc01g007800	SlOFP2	Chr01
Solyc01g007810	SlOFP3	Chr01
Solyc01g007810	SlOFP5	Chr01
Solyc03g034100	SlOFP6	Chr03
Solyc03g120190	SlOFP7	Chr03
Solyc03g120790	SlOFP8	Chr03
Solyc04g080210	SlOFP9	Chr04
Solyc05g055220	SlOFP10	Chr05
Solyc06g073040	SlOFP11	Chr06
Solyc06g074020	SlOFP12	Chr06
Solyc06g082450	SlOFP13	Chr06
Solyc06g082460	SlOFP14	Chr06
Solyc07g055240	SlOFP15	Chr07
Solyc08g068170	SlOFP16	Chr08
Solyc09g018200	SlOFP17	Chr09
Solyc09g065350	SlOFP18	Chr09
Solyc09g082080	SlOFP19	Chr09
Solyc10g076180	SlOFP20	Chr10
Solyc10g082050	SlOFP21	Chr10
Solyc10g082060	SlOFP22	Chr10
Solyc10g083070	SlOFP23	Chr10
Solyc10g083080	SlOFP26	Chr10
Solyc10g083090	SlOFP27	Chr10
Solyc10g083100	SlOFP28	Chr10
Solyc11g006670	SlOFP29	Chr11
Solyc11g068780	SlOFP30	Chr11
Arabidopsis gene model	Suggested gene name	Chromosome
AT5G01840	AtOFP1	Chr05
AT2G30400	AtOFP2	Chr02
AT5G58360	AtOFP3	Chr02
AT1G06920	AtOFP4	Chr01
AT4G18830	AtOFP5	Chr04
AT3G52525	AtOFP6	Chr03
AT2G18500	AtOFP7	Chr02
AT5G19650	AtOFP8	Chr05
AT4G04030	AtOFP9	Chr04
AT5G22240	AtOFP10	Chr05
AT4G14860	AtOFP11	Chr04
AT1G05420	AtOFP12	Chr01
AT5G04820	AtOFP13	Chr05
AT1G79960	AtOFP14	Chr01
AT2G36050	AtOFP15	Chr02
AT2G32100	AtOFP16	Chr02
AT2G30395	AtOFP17	Chr02
AT3G52540	AtOFP18	Chr03
AT2G36026	AtOFP19	Chr02
AT1G06923	AtOFP20	Chr01
