# Supplementary material for: Identification of Bottle Gourd (Lagenaria siceraria) OVATE Family Genes and Functional Characterization of LsOVATE1
Source: Biomolecules. 2022 Dec 30;13(1):85. doi: 10.3390/biom13010085 (PMC9855390; doi:10.3390/biom13010085)
Supplement: Supplementary file 1 [file biomolecules-13-00085-s001.zip › Table S3.xlsx]

## Sheet: Table S3
Table S3. GO analysis of OVATE proteins.
ID	Biological-Process	Cellular-Component	Molecular-Function
HG_GLEAN_10023338	GO:0006355:regulation of transcription, DNA-templated;GO:0008150:biological_process;GO:0009889:regulation of biosynthetic process;GO:0009890:negative regulation of biosynthetic process;GO:0009892:negative regulation of metabolic process;GO:0010468:regulation of gene expression;GO:0010556:regulation of macromolecule biosynthetic process;GO:0010558:negative regulation of macromolecule biosynthetic …	NA	NA
HG_GLEAN_10016945	GO:0006355:regulation of transcription, DNA-templated;GO:0008150:biological_process;GO:0009889:regulation of biosynthetic process;GO:0009890:negative regulation of biosynthetic process;GO:0009892:negative regulation of metabolic process;GO:0009966:regulation of signal transduction;GO:0010468:regulation of gene expression;GO:0010556:regulation of macromolecule biosynthetic process;GO:0010558:negat…	GO:0005575:cellular_component;GO:0005622:intracellular;GO:0005634:nucleus;GO:0005737:cytoplasm;GO:0043226:organelle;GO:0043227:membrane-bounded organelle;GO:0043229:intracellular organelle;GO:0043231:intracellular membrane-bounded organelle	NA
HG_GLEAN_10020458	GO:0001558:regulation of cell growth;GO:0006355:regulation of transcription, DNA-templated;GO:0008150:biological_process;GO:0009889:regulation of biosynthetic process;GO:0009890:negative regulation of biosynthetic process;GO:0009892:negative regulation of metabolic process;GO:0010468:regulation of gene expression;GO:0010556:regulation of macromolecule biosynthetic process;GO:0010558:negative regu…	GO:0005575:cellular_component;GO:0005622:intracellular;GO:0005634:nucleus;GO:0005730:nucleolus;GO:0005856:cytoskeleton;GO:0031974:membrane-enclosed lumen;GO:0031981:nuclear lumen;GO:0043226:organelle;GO:0043227:membrane-bounded organelle;GO:0043228:non-membrane-bounded organelle;GO:0043229:intracellular organelle;GO:0043231:intracellular membrane-bounded organelle;GO:0043232:intracellular non-mem…	NA
HG_GLEAN_10015982	GO:0006139:nucleobase-containing compound metabolic process;GO:0006259:DNA metabolic process;GO:0006260:DNA replication;GO:0006261:DNA-dependent DNA replication;GO:0006281:DNA repair;GO:0006725:cellular aromatic compound metabolic process;GO:0006807:nitrogen compound metabolic process;GO:0006950:response to stress;GO:0006974:cellular response to DNA damage stimulus;GO:0008150:biological_process;G…	GO:0005575:cellular_component;GO:0005622:intracellular;GO:0005634:nucleus;GO:0005657:replication fork;GO:0005663:DNA replication factor C complex;GO:0005694:chromosome;GO:0005886:plasma membrane;GO:0016020:membrane;GO:0032991:protein-containing complex;GO:0043226:organelle;GO:0043227:membrane-bounded organelle;GO:0043228:non-membrane-bounded organelle;GO:0043229:intracellular organelle;GO:0043231…	NA
HG_GLEAN_10017349	GO:0001558:regulation of cell growth;GO:0006355:regulation of transcription, DNA-templated;GO:0008150:biological_process;GO:0009889:regulation of biosynthetic process;GO:0009890:negative regulation of biosynthetic process;GO:0009892:negative regulation of metabolic process;GO:0010468:regulation of gene expression;GO:0010556:regulation of macromolecule biosynthetic process;GO:0010558:negative regu…	GO:0005575:cellular_component;GO:0005622:intracellular;GO:0005634:nucleus;GO:0005730:nucleolus;GO:0005856:cytoskeleton;GO:0031974:membrane-enclosed lumen;GO:0031981:nuclear lumen;GO:0043226:organelle;GO:0043227:membrane-bounded organelle;GO:0043228:non-membrane-bounded organelle;GO:0043229:intracellular organelle;GO:0043231:intracellular membrane-bounded organelle;GO:0043232:intracellular non-mem…	NA
HG_GLEAN_10010244	GO:0006355:regulation of transcription, DNA-templated;GO:0008150:biological_process;GO:0009889:regulation of biosynthetic process;GO:0009890:negative regulation of biosynthetic process;GO:0009892:negative regulation of metabolic process;GO:0010468:regulation of gene expression;GO:0010556:regulation of macromolecule biosynthetic process;GO:0010558:negative regulation of macromolecule biosynthetic …	NA	NA
HG_GLEAN_10001965	GO:0006355:regulation of transcription, DNA-templated;GO:0008150:biological_process;GO:0009889:regulation of biosynthetic process;GO:0009890:negative regulation of biosynthetic process;GO:0009892:negative regulation of metabolic process;GO:0010468:regulation of gene expression;GO:0010556:regulation of macromolecule biosynthetic process;GO:0010558:negative regulation of macromolecule biosynthetic …	GO:0005575:cellular_component;GO:0005886:plasma membrane;GO:0016020:membrane;GO:0071944:cell periphery	NA
HG_GLEAN_10007946	GO:0006355:regulation of transcription, DNA-templated;GO:0008150:biological_process;GO:0009889:regulation of biosynthetic process;GO:0009890:negative regulation of biosynthetic process;GO:0009892:negative regulation of metabolic process;GO:0010468:regulation of gene expression;GO:0010556:regulation of macromolecule biosynthetic process;GO:0010558:negative regulation of macromolecule biosynthetic …	NA	NA
HG_GLEAN_10020074	GO:0006355:regulation of transcription, DNA-templated;GO:0008150:biological_process;GO:0009889:regulation of biosynthetic process;GO:0009890:negative regulation of biosynthetic process;GO:0009892:negative regulation of metabolic process;GO:0010468:regulation of gene expression;GO:0010556:regulation of macromolecule biosynthetic process;GO:0010558:negative regulation of macromolecule biosynthetic …	NA	NA
HG_GLEAN_10004119	GO:0006355:regulation of transcription, DNA-templated;GO:0008150:biological_process;GO:0009889:regulation of biosynthetic process;GO:0009890:negative regulation of biosynthetic process;GO:0009892:negative regulation of metabolic process;GO:0010468:regulation of gene expression;GO:0010556:regulation of macromolecule biosynthetic process;GO:0010558:negative regulation of macromolecule biosynthetic …	NA	NA
HG_GLEAN_10020073	GO:0006355:regulation of transcription, DNA-templated;GO:0008150:biological_process;GO:0009889:regulation of biosynthetic process;GO:0009890:negative regulation of biosynthetic process;GO:0009892:negative regulation of metabolic process;GO:0009966:regulation of signal transduction;GO:0010468:regulation of gene expression;GO:0010556:regulation of macromolecule biosynthetic process;GO:0010558:negat…	GO:0005575:cellular_component;GO:0005622:intracellular;GO:0005634:nucleus;GO:0005737:cytoplasm;GO:0043226:organelle;GO:0043227:membrane-bounded organelle;GO:0043229:intracellular organelle;GO:0043231:intracellular membrane-bounded organelle	NA
HG_GLEAN_10006715	GO:0006355:regulation of transcription, DNA-templated;GO:0008150:biological_process;GO:0009889:regulation of biosynthetic process;GO:0009890:negative regulation of biosynthetic process;GO:0009892:negative regulation of metabolic process;GO:0010468:regulation of gene expression;GO:0010556:regulation of macromolecule biosynthetic process;GO:0010558:negative regulation of macromolecule biosynthetic …	NA	NA
HG_GLEAN_10001585	GO:0006355:regulation of transcription, DNA-templated;GO:0008150:biological_process;GO:0009889:regulation of biosynthetic process;GO:0009890:negative regulation of biosynthetic process;GO:0009892:negative regulation of metabolic process;GO:0010468:regulation of gene expression;GO:0010556:regulation of macromolecule biosynthetic process;GO:0010558:negative regulation of macromolecule biosynthetic …	NA	NA
HG_GLEAN_10012688	GO:0006355:regulation of transcription, DNA-templated;GO:0008150:biological_process;GO:0009889:regulation of biosynthetic process;GO:0009890:negative regulation of biosynthetic process;GO:0009892:negative regulation of metabolic process;GO:0010468:regulation of gene expression;GO:0010556:regulation of macromolecule biosynthetic process;GO:0010558:negative regulation of macromolecule biosynthetic …	NA	NA
