# Supplementary material for: Identification of Bottle Gourd (Lagenaria siceraria) OVATE Family Genes and Functional Characterization of LsOVATE1
Source: Biomolecules. 2022 Dec 30;13(1):85. doi: 10.3390/biom13010085 (PMC9855390; doi:10.3390/biom13010085)
Supplement: Supplementary file 1 [file biomolecules-13-00085-s001.zip › Table S4.xlsx]

## Sheet: Table S4
Table S4. List of RNA-Seq data.
accession	study	object_status	bioproject_accession	sample_name	library_ID	title	library_strategy	library_source	library_selection	library_layout	platform	instrument_model	design_description	filetype	filename	filename2	filename3	filename4
SRR8905709	SRP095913	new	PRJNA200441	HZ-Ov-6dba-3	H0.2-0.5.3	H0.2-0.5.3	RNAseq	RNA-Seq	TRANSCRIPTOMIC	RANDOM	paired	ILLUMINA	Illumina HiSeq 4000	fastq	H0.2-0.5.3_R1.fastq.gz	H0.2-0.5.3_R2.fastq.gz
SRR8905708	SRP095913	new	PRJNA200441	HZ-Ov-4dba-3	H0.5-0.6.3	H0.5-0.6.3	RNAseq	RNA-Seq	TRANSCRIPTOMIC	RANDOM	paired	ILLUMINA	Illumina HiSeq 4000	fastq	0.5-0.6.3_R1.fastq.gz	0.5-0.6.3_R2.fastq.gz
SRR8905684	SRP095913	new	PRJNA200441	HZ-Ov-8dba-1	H-0-2.1	H-0-2.1	RNAseq	RNA-Seq	TRANSCRIPTOMIC	RANDOM	paired	ILLUMINA	Illumina HiSeq 4000	fastq	H-0-2.1_R1.fastq.gz	H-0-2.1_R2.fastq.gz
SRR8905710	SRP095913	new	PRJNA200441	HZ-Ov-8dba-2	H-0-2.2	H-0-2.2	RNAseq	RNA-Seq	TRANSCRIPTOMIC	RANDOM	paired	ILLUMINA	Illumina HiSeq 4000	fastq	H0-2.2_R1.fastq.gz	H0-2.2_R2.fastq.gz
SRR8905686	SRP095913	new	PRJNA200441	HZ-Ov-8dba-3	H-0-2.3	H-0-2.3	RNAseq	RNA-Seq	TRANSCRIPTOMIC	RANDOM	paired	ILLUMINA	Illumina HiSeq 4000	fastq	H-0-2.3_R1.fastq.gz	H-0-2.3_R2.fastq.gz
SRR8905685	SRP095913	new	PRJNA200441	HZ-Ov-6dba-1	H0-2-0-5.1	H0-2-0-5.1	RNAseq	RNA-Seq	TRANSCRIPTOMIC	RANDOM	paired	ILLUMINA	Illumina HiSeq 4000	fastq	H0-2-0-5.1_R1.fastq.gz	H0-2-0-5.1_R2.fastq.gz
SRR8905688	SRP095913	new	PRJNA200441	HZ-Ov-6dba-2	H0-2-0-5.2	H0-2-0-5.2	RNAseq	RNA-Seq	TRANSCRIPTOMIC	RANDOM	paired	ILLUMINA	Illumina HiSeq 4000	fastq	H0-2-0-5.2_R1.fastq.gz	H0-2-0-5.2_R2.fastq.gz
SRR8905687	SRP095913	new	PRJNA200441	HZ-Ov-4dba-1	H0-5-0-6.1	H0-5-0-6.1	RNAseq	RNA-Seq	TRANSCRIPTOMIC	RANDOM	paired	ILLUMINA	Illumina HiSeq 4000	fastq	H0-5-0-6.1_R1.fastq.gz	H0-5-0-6.1_R2.fastq.gz
SRR8905707	SRP095913	new	PRJNA200441	HZ-Ov-4dba-2	H0-5-0-6.2	H0-5-0-6.2	RNAseq	RNA-Seq	TRANSCRIPTOMIC	RANDOM	paired	ILLUMINA	HiSeq X Ten	fastq	H0-5-0-6.2_R1.fastq.gz	H0-5-0-6.2_R2.fastq.gz
SRR8905706	SRP095913	new	PRJNA200441	HZ-Ov-2dba-1	H0-5-1.1	H0-5-1.1	RNAseq	RNA-Seq	TRANSCRIPTOMIC	RANDOM	paired	ILLUMINA	HiSeq X Ten	fastq	H0-5-1.1_R1.fastq.gz	H0-5-1.1_R2.fastq.gz
SRR8905692	SRP095913	new	PRJNA200441	HZ-Ov-2dba-2	H0-5-1.2	H0-5-1.2	RNAseq	RNA-Seq	TRANSCRIPTOMIC	RANDOM	paired	ILLUMINA	HiSeq X Ten	fastq	H0-5-1.2_R1.fastq.gz	H0-5-1.2_R2.fastq.gz
SRR8905691	SRP095913	new	PRJNA200441	HZ-Ov-2dba-3	H0-5-1.3	H0-5-1.3	RNAseq	RNA-Seq	TRANSCRIPTOMIC	RANDOM	paired	ILLUMINA	HiSeq X Ten	fastq	H0.5-1.3_R1.fastq.gz	H0.5-1.3_R2.fastq.gz
SRR8905690	SRP095913	new	PRJNA200441	HZ-Ov-0dba-1	H1513.1	H1513.1	RNAseq	RNA-Seq	TRANSCRIPTOMIC	RANDOM	paired	ILLUMINA	HiSeq X Ten	fastq	H1513.1_R1.fastq.gz	H1513.1_R2.fastq.gz
SRR8905689	SRP095913	new	PRJNA200441	HZ-Ov-0dba-2	H1513.2	H1513.2	RNAseq	RNA-Seq	TRANSCRIPTOMIC	RANDOM	paired	ILLUMINA	HiSeq X Ten	fastq	H1513.2_R1.fastq.gz	H1513.2_R2.fastq.gz
SRR8905696	SRP095913	new	PRJNA200441	HZ-Ov-0dba-3	H1513.3	H1513.3	RNAseq	RNA-Seq	TRANSCRIPTOMIC	RANDOM	paired	ILLUMINA	Illumina HiSeq 4000	fastq	H1513.3_R1.fastq.gz	H1513.3_R2.fastq.gz
SRR8905695	SRP095913	new	PRJNA200441	Y-Ov-8dba-3	Y0.1-0.2.3	Y0.1-0.2.3	RNAseq	RNA-Seq	TRANSCRIPTOMIC	RANDOM	paired	ILLUMINA	Illumina HiSeq 4000	fastq	Y0.1-0.2.3_R1.fastq.gz	Y0.1-0.2.3_R2.fastq.gz
SRR8905694	SRP095913	new	PRJNA200441	Y-Ov-6dba-3	Y0.2-0.3.3	Y0.2-0.3.3	RNAseq	RNA-Seq	TRANSCRIPTOMIC	RANDOM	paired	ILLUMINA	Illumina HiSeq 4000	fastq	Y0.2-0.3.3_R1.fastq.gz	Y0.2-0.3.3_R2.fastq.gz
SRR8905693	SRP095913	new	PRJNA200441	Y-Ov-4dba-3	Y0.3-0.4.3	Y0.3-0.4.3	RNAseq	RNA-Seq	TRANSCRIPTOMIC	RANDOM	paired	ILLUMINA	Illumina HiSeq 4000	fastq	Y0.3-0.4.3_R1.fastq.gz	Y0.3-0.4.3_R2.fastq.gz
SRR8905698	SRP095913	new	PRJNA200441	Y-Ov-2dba-3	Y0.9-1.3	Y0.9-1.3	RNAseq	RNA-Seq	TRANSCRIPTOMIC	RANDOM	paired	ILLUMINA	Illumina HiSeq 4000	fastq	Y0.9-1.3_R1.fastq.gz	Y0.9-1.3_R2.fastq.gz
SRR8905697	SRP095913	new	PRJNA200441	Y-Ov-8dba-1	Y0-1-0-2.1	Y0-1-0-2.1	RNAseq	RNA-Seq	TRANSCRIPTOMIC	RANDOM	paired	ILLUMINA	Illumina HiSeq 4000	fastq	Y0-1-0-2.1_R1.fastq.gz	Y0-1-0-2.1_R2.fastq.gz
SRR8905701	SRP095913	new	PRJNA200441	Y-Ov-8dba-2	Y0-1-0-2.2	Y0-1-0-2.2	RNAseq	RNA-Seq	TRANSCRIPTOMIC	RANDOM	paired	ILLUMINA	Illumina HiSeq 4000	fastq	Y0-1-0-2.2_R1.fastq.gz	Y0-1-0-2.2_R2.fastq.gz
SRR8905702	SRP095913	new	PRJNA200441	Y-Ov-6dba-1	Y0-2-0-3.1	Y0-2-0-3.1	RNAseq	RNA-Seq	TRANSCRIPTOMIC	RANDOM	paired	ILLUMINA	Illumina HiSeq 4000	fastq	Y0-2-0-3.1_R1.fastq.gz	Y0-2-0-3.1_R2.fastq.gz
SRR8905699	SRP095913	new	PRJNA200441	Y-Ov-6dba-2	Y0-2-0-3.2	Y0-2-0-3.2	RNAseq	RNA-Seq	TRANSCRIPTOMIC	RANDOM	paired	ILLUMINA	Illumina HiSeq 4000	fastq	Y0-2-0-3.2_R1.fastq.gz	Y0-2-0-3.2_R2.fastq.gz
SRR8905700	SRP095913	new	PRJNA200441	Y-Ov-4dba-1	Y0-3-0-4.1	Y0-3-0-4.1	RNAseq	RNA-Seq	TRANSCRIPTOMIC	RANDOM	paired	ILLUMINA	Illumina HiSeq 4001	fastq	Y0-3-0-4.1_R1.fastq.gz	Y0-3-0-4.1_R2.fastq.gz
SRR8905704	SRP095913	new	PRJNA200441	Y-Ov-4dba-2	Y0-3-0-4.2	Y0-3-0-4.2	RNAseq	RNA-Seq	TRANSCRIPTOMIC	RANDOM	paired	ILLUMINA	Illumina HiSeq 4002	fastq	Y0-3-0-4.2_R1.fastq.gz	Y0-3-0-4.2_R2.fastq.gz
SRR8905705	SRP095913	new	PRJNA200441	Y-Ov-2dba-1	Y0-9-1.1	Y0-9-1.1	RNAseq	RNA-Seq	TRANSCRIPTOMIC	RANDOM	paired	ILLUMINA	Illumina HiSeq 4003	fastq	Y0-9-1.1_R1.fastq.gz	Y0-9-1.1_R2.fastq.gz
SRR8905703	SRP095913	new	PRJNA200441	Y-Ov-2dba-2	Y0-9-1.2	Y0-9-1.2	RNAseq	RNA-Seq	TRANSCRIPTOMIC	RANDOM	paired	ILLUMINA	Illumina HiSeq 4004	fastq	Y0-9-1.2_R1.fastq.gz	Y0-9-1.2_R2.fastq.gz
SRR5930670	SRP095913	new	PRJNA200441	Y-Ov-0dba-1	YD-4-1	YD-4-1	RNAseq	RNA-Seq	TRANSCRIPTOMIC	RANDOM	paired	ILLUMINA	HiSeq X Ten	fastq	YD-4-1_R1.fq.gz	YD-4-1_R2.fq.gz
SRR5930673	SRP095913	new	PRJNA200441	Y-Ov-0dba-2	YD-4-2	YD-4-2	RNAseq	RNA-Seq	TRANSCRIPTOMIC	RANDOM	paired	ILLUMINA	HiSeq X Ten	fastq	YD-4-2_R1.fq.gz	YD-4-2_R2.fq.gz
SRR5930674	SRP095913	new	PRJNA200441	Y-Ov-0dba-3	YD-4-3	YD-4-3	RNAseq	RNA-Seq	TRANSCRIPTOMIC	RANDOM	paired	ILLUMINA	HiSeq X Ten	fastq	YD-4-3_R1.fq.gz	YD-4-3_R2.fq.gz
